# Supplementary material for: Mit welchen diagnostischen Verfahren wird in Grundschulen Sprachförderbedarf festgestellt?
Source: Atypon-hosted journal article supplement (doi:10.1026/2191-9186/a000313), 2017-07-01
Supplement: 2191-9186_a000313_esm1.pdf [file 2191-9186_a000313_esm1.pdf]

Tabelle 1: Schulstichprobe nach Bundesländern

| Bundesland             | Anzahl der Schulen in Stichprobe der IQB-Ländervergleichsstudie 2011 | Anzahl der Schulen, in denen standardisierte Verfahren eingesetzt wurden | Anzahl der Schulen, in der konkrete Angaben zu den eingesetzten standardisierten Verfahren gemacht wurden | Anzahl der Schulen, in denen unstandardisierte Verfahren eingesetzt wurden | Anzahl der Schulen, in der konkrete Angaben zu den eingesetzten unstandardisierten Verfahren gemacht wurden |
|------------------------|----------------------------------------------------------------------|--------------------------------------------------------------------------|-----------------------------------------------------------------------------------------------------------|----------------------------------------------------------------------------|-------------------------------------------------------------------------------------------------------------|
| Baden Württemberg      | 70                                                                   | 56                                                                       | 24                                                                                                        | 7                                                                          | 0                                                                                                           |
| Bayern                 | 74                                                                   | 40                                                                       | 13                                                                                                        | 33                                                                         | 18                                                                                                          |
| Berlin                 | 110                                                                  | 96                                                                       | 44                                                                                                        | 38                                                                         | 27                                                                                                          |
| Brandenburg            | 75                                                                   | 43                                                                       | 17                                                                                                        | 22                                                                         | 16                                                                                                          |
| Bremen                 | 88                                                                   | 73                                                                       | 34                                                                                                        | 25                                                                         | 15                                                                                                          |
| Hamburg                | 89                                                                   | 89                                                                       | 53                                                                                                        | 21                                                                         | 16                                                                                                          |
| Hessen                 | 72                                                                   | 54                                                                       | 24                                                                                                        | 12                                                                         | 6                                                                                                           |
| Mecklenburg-Vorpommern | 69                                                                   | 22                                                                       | 12                                                                                                        | 10                                                                         | 2                                                                                                           |
| Niedersachsen          | 72                                                                   | 31                                                                       | 20                                                                                                        | 20                                                                         | 9                                                                                                           |
| Nordrhein-Westfalen    | 71                                                                   | 55                                                                       | 26                                                                                                        | 20                                                                         | 10                                                                                                          |
| Rheinland-Pfalz        | 70                                                                   | 22                                                                       | 10                                                                                                        | 14                                                                         | 6                                                                                                           |
| Saarland               | 75                                                                   | 38                                                                       | 15                                                                                                        | 4                                                                          | 1                                                                                                           |
| Sachsen                | 68                                                                   | 27                                                                       | 7                                                                                                         | 15                                                                         | 7                                                                                                           |
| Sachsen-Anhalt         | 73                                                                   | 33                                                                       | 13                                                                                                        | 20                                                                         | 8                                                                                                           |
| Schleswig-Holstein     | 74                                                                   | 30                                                                       | 11                                                                                                        | 30                                                                         | 16                                                                                                          |
| Thüringen              | 77                                                                   | 25                                                                       | 12                                                                                                        | 20                                                                         | 10                                                                                                          |
| Gesamt                 | 1227                                                                 | 734                                                                      | 335                                                                                                       | 311                                                                        | 167                                                                                                         |

Tabelle 2: Von den Schulleitungen genannte standardisierte sprachdiagnostische Verfahren (incl. der Häufigkeit der Nennung) ( $N_{ges} = 335$ )<sup>1</sup>

| #  | Name des Verfahrens                                                                    | Häufigkeit<br>(in %) | $N$ | Grund-<br>schulalter <sup>2</sup> | Nicht-<br>deutsche<br>Herkunfts-<br>sprache | Schrift-<br>sprachliche<br>Kompetenzen <sup>3</sup> |
|----|----------------------------------------------------------------------------------------|----------------------|-----|-----------------------------------|---------------------------------------------|-----------------------------------------------------|
| 1  | HSP (Hamburger Schreib-Probe)                                                          | 66.9                 | 224 | X                                 |                                             | X                                                   |
| 2  | Stolperwörter-Lesetest                                                                 | 12.8                 | 43  | X                                 |                                             | X                                                   |
| 3  | HAVAS 5 (Hamburger Verfahren zur Analyse des Sprachstandes bei Fünf-Jährigen)          | 7.4                  | 25  |                                   | X                                           |                                                     |
| 4  | Cito-Sprachtest                                                                        | 5.7                  | 19  |                                   | X                                           |                                                     |
| 5  | DBL (Diagnostische Bilderlisten)                                                       | 5.1                  | 17  | X                                 |                                             | X                                                   |
| 6  | DRT (Deutscher Rechtschreibtest)                                                       | 5.1                  | 17  | X                                 |                                             | X                                                   |
| 7  | MÜSC (Münsteraner Screening zur Früherkennung von Lese-Rechtschreibschwierigkeiten)    | 3.6                  | 12  | (X)                               |                                             | (X)                                                 |
| 8  | KEKS-Test (Kompetenzerfassung in Kindergarten und Schule)                              | 2.7                  | 9   | X                                 | X                                           | X <sup>5</sup>                                      |
| 9  | BISC (Bielefelder Screening zur Früherkennung von Lese-Rechtschreibschwierigkeiten)    | 2.1                  | 7   |                                   |                                             | (X)                                                 |
| 10 | HASE (Heidelberger Auditives Screening in der Einschulungsuntersuchung)                | 2.1                  | 7   |                                   |                                             | (X)                                                 |
| 11 | MSVK (Marburger Sprachverständnistest für Kinder)                                      | 2.1                  | 7   | (X)                               |                                             |                                                     |
| 12 | ELFE (Leseverständnistest für Erst- bis Sechstklässler)                                | 1.8                  | 6   | X                                 |                                             | X                                                   |
| 13 | Bremer Rechtschreibtest                                                                | 1.5                  | 5   | X                                 |                                             | X                                                   |
| 14 | HAMLET (Hamburger Lesetest)                                                            | 1.5                  | 5   | X                                 |                                             | X                                                   |
| 15 | SFD (Sprachstandsüberprüfung und Förderdiagnostik für Ausländer- und Aussiedlerkinder) | 1.5                  | 5   | X                                 | X                                           |                                                     |
| 16 | Bärenstark                                                                             | 1.2                  | 4   |                                   | X                                           |                                                     |
| 17 | Fit in Deutsch                                                                         | 1.2                  | 4   |                                   | X                                           |                                                     |
| 18 | Salzburger Lesescreening                                                               | 0.9                  | 3   | X                                 |                                             | X                                                   |
| 19 | Salzburger Lese- und Rechtschreibtest                                                  | 0.9                  | 3   | X                                 |                                             | X                                                   |

|    |                                                                                                                                             |     |   |     |                  |     |
|----|---------------------------------------------------------------------------------------------------------------------------------------------|-----|---|-----|------------------|-----|
| 20 | Differenzierungsprobe/Breuer-Weuffen-Test                                                                                                   | 0.9 | 3 | (X) |                  |     |
| 21 | Dysgrammatiker Prüfmaterial                                                                                                                 | 0.6 | 2 | (X) |                  |     |
| 22 | PB-LRS (Phonologische Bewusstheit bei Kindergartenkindern und Schulanfängern)                                                               | 0.6 | 2 | (X) |                  | (X) |
| 23 | WLLP-R (Würzburger Leiseleseprobe)                                                                                                          | 0.6 | 2 | X   |                  | X   |
| 24 | HLP (Hamburger Leseprobe)                                                                                                                   | 0.6 | 2 | X   |                  | X   |
| 25 | ARS (Anlaute hören, Reime finden, Silben klatschen: Erhebungsverfahren zur phonologischen Bewusstheit für Vorschulkinder und Schulanfänger) | 0.6 | 2 | (X) | X                | (X) |
| 26 | LPB (Ravensburger Lautprüfbogen)                                                                                                            | 0.6 | 2 |     |                  |     |
| 27 | Deutsch Plus                                                                                                                                | 0.6 | 2 |     | X                |     |
| 28 | Delfin (Diagnostik, Elternarbeit und Förderung der Sprachkompetenz)                                                                         | 0.6 | 2 |     |                  |     |
| 29 | Rechtschreibwerkstatt von Stumpfenhorst (incl. Diagnosetest)                                                                                | 0.6 | 2 | X   |                  | X   |
| 30 | BLT (Bremer Lesetest)                                                                                                                       | 0.3 | 1 | X   |                  | X   |
| 31 | Alfons Diagnostik                                                                                                                           | 0.3 | 1 | X   |                  | X   |
| 32 | H-LAD (Heidelberger Lautdifferenzierungstest)                                                                                               | 0.3 | 1 | X   |                  |     |
| 33 | Schulleistungsbatterie für Lernbehinderte                                                                                                   | 0.3 | 1 | X   |                  |     |
| 34 | ETS 4-8 (Entwicklungstest Sprache 4 bis 8 Jahre)                                                                                            | 0.3 | 1 | (X) |                  |     |
| 35 | HSET (Heidelberger Sprachentwicklungstest)                                                                                                  | 0.3 | 1 | (X) |                  |     |
| 36 | Kieler Schreibprobe                                                                                                                         | 0.3 | 1 | X   |                  | X   |
| 37 | C-Test                                                                                                                                      | 0.3 | 1 | X   | (X) <sup>4</sup> | X   |
| 38 | Profilanalyse nach Grieshaber                                                                                                               | 0.3 | 1 | X   | X                |     |
| 39 | WET (Wiener Entwicklungstest)                                                                                                               | 0.3 | 1 |     |                  |     |
| 40 | KISTE (Kindersprachtest für das Vorschulalter)                                                                                              | 0.3 | 1 |     |                  |     |
| 41 | P-ITPA (Potsdam-Illinois Test für Psycholinguistische Fähigkeiten)                                                                          | 0.3 | 1 | X   |                  |     |
| 42 | Mottier-Test                                                                                                                                | 0.3 | 1 | X   | X                |     |
| 43 | WRT (Weingartener Grundwortschatz Rechtschreib-Test)                                                                                        | 0.3 | 1 | X   |                  | X   |

|    |                                                              |     |   |     |   |                |
|----|--------------------------------------------------------------|-----|---|-----|---|----------------|
| 44 | WWT (Wortschatz- und Wortfindungstest für 6- bis 10-Jährige) | 0.3 | 1 | X   |   |                |
| 45 | Deutsch für den Schulstart                                   | 0.3 | 1 | (X) | X |                |
| 46 | Materialien aus dem Dudenverlag                              | 0.3 | 1 | X   |   | X              |
| 47 | GSS 8 (Göppinger sprachfreier Schuleignungstest)             | 0.3 | 1 |     |   |                |
| 48 | PLGT (Potsdamer Lesegeschwindigkeitstest)                    | 0.3 | 1 | X   |   | X              |
| 49 | Lesefitness                                                  | 0.3 | 1 | X   |   | X              |
| 50 | VERA 3                                                       | 0.3 | 1 | X   |   | X <sup>5</sup> |

<sup>1</sup>  $N_{ges}$  = Anzahl der Schulleiterinnen und Schulleiter, die das offene Item zu den eingesetzten standardisierten Verfahren bearbeitet haben.

<sup>2</sup> Geklammert sind Verfahren, die auf den Schulbeginn fokussieren oder neben dem Elementarbereich auch zu Beginn des Primarbereichs eingesetzt werden können.

<sup>3</sup> Geklammert sind Verfahren, die explizit auf die Erfassung von Vorläuferfähigkeiten schriftsprachlicher Kompetenz zielen.

<sup>4</sup> Der C-Test wurde ursprünglich für andere Anwendungsbereiche entwickelt (z. B. erwachsene Fremdsprachlernende), wird aber auch bei Kindern mit nichtdeutscher Herkunftssprache eingesetzt (z. B. Scholten-Akoun, D. & Baur, R. S. (2012). Der C-Test als ein Instrument zur Messung der Schriftsprachkompetenzen von Lehramtsstudierenden (auch) mit Migrationshintergrund – eine Studie. In B. Ahrenholz & W. Knapp (Hrsg.), *Sprachstand erheben – Spracherwerb erforschen. Beiträge aus dem 6. Workshop „Kinder mit Migrationshintergrund“* (S. 307–330). Freiburg: Fillibach.

<sup>5</sup> Erfassung mündlicher und schriftlicher Sprachkompetenzen.

Tabelle 3: Von den Schulleitungen genannte unstandardisierte sprachdiagnostische Verfahren (incl. der Häufigkeit der Nennung) ( $N_{ges} = 167$ )<sup>2</sup>

| #  | Name des Verfahrens                                                                                   | Häufigkeit<br>(in %) | <i>N</i> | Grund-<br>schulalter <sup>2</sup> | Mehr-<br>sprachigkeit | Schrift-<br>sprachliche<br>Kompetenzen <sup>3</sup> |
|----|-------------------------------------------------------------------------------------------------------|----------------------|----------|-----------------------------------|-----------------------|-----------------------------------------------------|
| 1  | (nicht näher spezifizierte) Lernausgangsanalysen                                                      | 26.4                 | 44       | ?                                 | ?                     | ?                                                   |
| 2  | Sprachverhalten und Interesse an Sprache bei<br>Migrantenkindern in Kindertageseinrichtungen (Sismik) | 22.2                 | 37       |                                   | X                     |                                                     |
| 3  | Eigenentwicklungen                                                                                    | 12.6                 | 21       | ?                                 | ?                     | ?                                                   |
| 4  | Lernausgangslage Berlin (LauBe)                                                                       | 12.0                 | 20       | X                                 |                       | X                                                   |
| 5  | Individuelle Lernstandsanalysen in der Grundschule (ILeA)                                             | 11.4                 | 19       | X                                 |                       | X                                                   |
| 6  | Mit Mirola durch den Zauberwald                                                                       | 9.6                  | 16       | (X)                               |                       |                                                     |
| 7  | Sprachentwicklung und Literacy bei deutschsprachig<br>aufwachsenden Kindern (Seldak)                  | 3.0                  | 5        |                                   |                       |                                                     |
| 8  | Das leere Blatt                                                                                       | 1.8                  | 3        | (X)                               |                       |                                                     |
| 9  | Kieler Einschulungsverfahren                                                                          | 1.8                  | 3        |                                   |                       |                                                     |
| 10 | Informelle Schulleistungsdiagnostik IV (SLD IV)                                                       | 1.2                  | 2        | X                                 |                       | X                                                   |
| 11 | WESPE (Wir Erzieherinnen schätzen den Sprachstand ein)                                                | 1.2                  | 2        |                                   |                       |                                                     |
| 12 | Diagnosebogen zur Erfassung von Sprachstörungen<br>(Grunwald)                                         | 0.6                  | 1        |                                   |                       |                                                     |
| 13 | Unser Schulspiel (Burscheidt)                                                                         | 0.6                  | 1        | (X)                               |                       |                                                     |
| 14 | Förder-Diagnose-Box (Schroedel)                                                                       | 0.6                  | 1        | X                                 |                       | X                                                   |
| 15 | Lernvoraussetzungen am Schulanfang (Ostermann)                                                        | 0.6                  | 1        | (X)                               |                       |                                                     |
| 16 | Beobachtungsverfahren nach Kleinmann                                                                  | 0.6                  | 1        | X                                 |                       |                                                     |
| 17 | Könnerheft                                                                                            | 0.6                  | 1        | X                                 |                       | X                                                   |
| 18 | Sprachlerntagebuch                                                                                    | 0.6                  | 1        |                                   |                       |                                                     |
| 19 | Das Tulpenbeet (FörMig)                                                                               | 0.6                  | 1        | X                                 | X                     |                                                     |

<sup>2</sup> $N_{ges}$  = Anzahl der Schulleiterinnen und Schulleiter, die das offene Item zu den eingesetzten standardisierten Verfahren bearbeitet haben.
