# Supplementary material for: Mit welchen diagnostischen Verfahren wird in Grundschulen Sprachförderbedarf festgestellt?
Source: Atypon-hosted journal article supplement (doi:10.1026/2191-9186/a000313), 2017-07-01
Supplement: 2191-9186_a000313_esm2.pdf [file 2191-9186_a000313_esm2.pdf]

Tabelle 4: Übersicht der am häufigsten genannten *standardisierten* Verfahren

|                                                     | <b>HSP<sup>1</sup></b>                                                                                                                                                                           | <b>Stolperwörter-Lesetest<sup>2</sup></b>                                                        | <b>HAVAS 5<sup>3</sup></b>                                                                                                                                                  | <b>Cito-Sprachtest<sup>4</sup></b>                                                                           | <b>Diagnostische Bilderlisten<sup>5</sup></b>                                                                      |
|-----------------------------------------------------|--------------------------------------------------------------------------------------------------------------------------------------------------------------------------------------------------|--------------------------------------------------------------------------------------------------|-----------------------------------------------------------------------------------------------------------------------------------------------------------------------------|--------------------------------------------------------------------------------------------------------------|--------------------------------------------------------------------------------------------------------------------|
| <b>Diagnostische Zielsetzung</b>                    | Erfassung von Rechtschreibfähigkeiten                                                                                                                                                            | Erfassung von Lesefähigkeiten                                                                    | Profilanalyse zur kindlichen Sprachproduktion in Deutsch und in der Herkunftssprache                                                                                        | Sprachtest, Fokus auf Zweisprachigkeit                                                                       | Früherkennung von Schwierigkeiten im Lese-lernprozess; Screening                                                   |
| <b>Alter/Zielgruppe</b>                             | von der Mitte der 1. bis zur 10. Jahrgangsstufe                                                                                                                                                  | 1. bis 4. Klasse                                                                                 | 5 bis 7 Jahre                                                                                                                                                               | 4 bis 6 Jahre                                                                                                | Ende der 1. Klasse bis zum Beginn der 2. Klasse                                                                    |
| <b>Skalen/Subtests</b>                              | Zahl richtig geschriebener Wörter und Grapheme; „Lupenstellen“ als Indikator für Grad der Beherrschung untersch. Rechtschreibstrategien; überflüssige orthografische Elemente; Oberzeichenfehler | Lesegeschwindigkeit und -sicherheit auf der Satzebene                                            | Auswertung eines „Gesprächs“ über eine Bildergeschichte z. B. nach Aufgabenbewältigung, Bewältigung der Kommunikationssituation, Wortschatz, Verbstellung, Satzverbindungen | Test mit 4 Komponenten: Passiver Wortschatz, Kognitive Begriffe, Phonologisches Bewusstsein, Textverständnis | Schriftliche Benennung von Bildern durch Kinder, Bestimmung der Anzahl der Fehler, Ermittlung von Fehlerkategorien |
| <b>Mündliche vs. schriftsprachliche Kompetenzen</b> | Schriftlich                                                                                                                                                                                      | Schriftlich                                                                                      | Mündlich                                                                                                                                                                    | Mündlich                                                                                                     | Schriftlich                                                                                                        |
| <b>Rezeptive vs. produktive Sprachfähigkeiten</b>   | Produktiv                                                                                                                                                                                        | Rezeptiv                                                                                         | Fokus auf Produktion, aber (mittelbar) auch rezeptive Fähigkeiten, da Gespräch als Erhebungsmethode                                                                         | Rezeptiv                                                                                                     | Produktion                                                                                                         |
| <b>Durchführung</b>                                 | < 30 min, Einzel- oder Gruppentest                                                                                                                                                               | 5 bis 8 min, Gruppentest                                                                         | 10 bis 15 min, Einzeltest                                                                                                                                                   | 25 min, computerbasierter Einzeltest                                                                         | 20 bis 30 min, Gruppentest                                                                                         |
| <b>Objektivität</b>                                 | Standardisierung von Durchführung, Auswertung, Interpretation                                                                                                                                    | Keine Angaben, Standardisierung durch Testformat                                                 | Komplexe Auswertung, daher geringe Auswertungsobjektivität zu vermuten                                                                                                      | Standardisierung von Durchführung, Auswertung, Interpretation                                                | Standardisierung der Durchführung, keine Überprüfung d. Interrater-Reliabilität                                    |
| <b>Reliabilität</b>                                 | Interne Konsistenz: $\alpha = .92$ bis $.99$ ; Retest: $r_{tt} = .52$ bis $.93$                                                                                                                  | Reliabilitätsbestimmung im Zuge der LUST-1-Studie <sup>6</sup> , $\alpha > .88$ , $r_{tt} > .80$ | $\alpha = .63$ (Gesamtverfahren); hohe Heterogenität der Einzelindizes                                                                                                      | $\alpha$ (separat für Testkomponenten und Sprachen) von $.66$ bis $.91$                                      | $\alpha = .93$                                                                                                     |

|                                   |                                                                                                            |                                                                                                                            |                                                                        |                                                                                                       |                                                                                   |
|-----------------------------------|------------------------------------------------------------------------------------------------------------|----------------------------------------------------------------------------------------------------------------------------|------------------------------------------------------------------------|-------------------------------------------------------------------------------------------------------|-----------------------------------------------------------------------------------|
| <b>Validität</b>                  | Untersuchungen zur Kriteriumsvalidität (z. B. Recht-schreibnoten, andere Recht-schreibtests, Leseleistung) | Untersuchungen zur Kriteriumsvalidität im Zuge der LUST-1-Studie <sup>6</sup> (Lesenoten, Lehrerurteile, andere Verfahren) | Nur Angaben zu Ergebnissen einer explorativen Faktorenanalyse          | Nur Angaben zu Korrelation der Testkomponenten und zu Testergebnissen deutscher und türkischer Kinder | Untersuchungen zur Kriteriumsvalidität (u. a. Machsprechtest und Intelligenztest) |
| <b>Normierung</b>                 | Bundesweite Neunormierung aus dem Jahr 2012                                                                | Normierung 2005; nicht repräsentative Ad-hoc Stichprobe                                                                    | Angaben zu Durchschnittswerten einer Normierungsstichprobe aus Hamburg | (u. a.) Normierungsstudien in Duisburg 2003 und Bremen 2012                                           | Normierung aus dem Jahr 1993                                                      |
| <b>Steckbrief im ZUSE-Bericht</b> | Ja                                                                                                         | Nein                                                                                                                       | Ja                                                                     | Ja                                                                                                    | Nein                                                                              |
| <b>PSYNDEX-Review</b>             | Ja                                                                                                         | Nein                                                                                                                       | Nein                                                                   | Nein                                                                                                  | Ja                                                                                |

<sup>1</sup> May, P. (2013). *HSP 1 – 10. Hamburger Schreib-Probe. Manual/Handbuch: Diagnose orthografischer Kompetenz*. Dortmund: vpm.

<sup>2</sup> Metze, W. (2005). *Stolperwörter-Lesetest*. Verfügbar unter: [http://wilfriedmetze.de/Handanweisung\\_2009.pdf](http://wilfriedmetze.de/Handanweisung_2009.pdf) [14.05.2014]

<sup>3</sup> Reich, H. H. & Roth, H.-J. (2003). *Hamburger Verfahren zur Analyse des Sprachstands Fünfjähriger – HAVAS 5*. Landesinstitut für Lehrerbildung und Schulentwicklung Hamburg.

<sup>4</sup> Citogroep. (2004). *CITO. Test Zweisprachigkeit*. Arnheim: National Institute for Educational Measurement.

<sup>5</sup> Dummer-Smoch, L. (1993). *Die Diagnostischen Bilderlisten. Siebungsverfahren zur Früherkennung von Leselernschwierigkeiten im Leselernprozess*. Kiel: Veris.

<sup>6</sup> Brügelmann, H. (2003). *Lese-Untersuchung mit dem Stolperwörter-Test. Abschlussbericht des Projekts LUST-1*. Verfügbar unter: <http://www2.agprim.uni-siegen.de/lust/stolper%5B1%5D.03.bericht.schlussfassung.12-20.pdf> [07.11.2014]

Tabelle 5: Übersicht der am häufigsten genannten *unstandardisierten* Verfahren

|                                                     | SISMIK <sup>7</sup>                                                                                                                                 | LauBe <sup>8</sup>                                                                                                    | ILeA <sup>9</sup>                                                                                                               | Mirola <sup>10</sup>                                                                                                                                                                                          | SELDAK <sup>11</sup>                                                                                                                          |
|-----------------------------------------------------|-----------------------------------------------------------------------------------------------------------------------------------------------------|-----------------------------------------------------------------------------------------------------------------------|---------------------------------------------------------------------------------------------------------------------------------|---------------------------------------------------------------------------------------------------------------------------------------------------------------------------------------------------------------|-----------------------------------------------------------------------------------------------------------------------------------------------|
| <b>Diagnostische Zielsetzung</b>                    | Systematische Beobachtung und Dokumentation der Sprachentwicklung, Erfassung von Fördervoraussetzungen; Fokus auf Kinder mit Zuwanderungsgeschichte | Erfassung der Lernausgangslage zu Schulbeginn                                                                         | Individuelle Lernstandsanalyse, Entwicklung individueller Lernpläne                                                             | Erfassung der individuellen Lernausgangslage; Ableitung von Schlussfolgerungen für Unterricht, Förderung und Elternarbeit                                                                                     | Systematische Beobachtung und Dokumentation der Sprachentwicklung (vgl. SISMIK, aber mit Fokus auf Kinder mit Deutsch als Muttersprache)      |
| <b>Alter/Zielgruppe</b>                             | ab 3.5 Jahre bis zur Einschulung                                                                                                                    | Einsatz in den ersten Wochen nach Schuleintritt                                                                       | Versionen für alle Jahrgangsstufen in der Grundschule                                                                           | zu Beginn der 1. Klasse                                                                                                                                                                                       | ab 4 Jahre bis zur Einschulung                                                                                                                |
| <b>Skalen/Subtests</b>                              | 6 Skalen zu Sprachverhalten, sprachlichem Interesse und Sprachkompetenz; Erfassung von Kontextbedingungen (Familiensituation)                       | Schülerheft mit Aufgaben im Bereich Sprachentwicklung; Verknüpfung mit Portfolioverfahren „Lerndokumentation Sprache“ | Fokus der Materialien für das Fach Deutsch liegen auf Lesen u. Rechtschreibung; Kombination aus Test- und Beobachtungselementen | Erfasst werden Grob- und Feinmotorik, Wahrnehmung, Pränumerische Kompetenz, Lateralität, Sprachkompetenz, Artikulation, Phonologische Kompetenz, Merkfähigkeit sowie Arbeits- und Sozialemotionales Verhalten | 10 Skalen zu sprachlichen Kompetenzen (z. B. Wortschatz, Zuhören/Sinnverstehen, Sätze nachsprechen, Grammatik, Phonologie, Schreiben/Schrift) |
| <b>Mündliche vs. schriftsprachliche Kompetenzen</b> | Mündlich                                                                                                                                            | Mündlich und schriftlich                                                                                              | Schriftlich                                                                                                                     | Mündlich                                                                                                                                                                                                      | Mündlich                                                                                                                                      |
| <b>Rezeptive vs. produktive Sprachfähigkeiten</b>   | Rezeptiv und produktiv                                                                                                                              | Rezeptiv und produktiv                                                                                                | Rezeptiv und produktiv                                                                                                          | Rezeptiv und produktiv                                                                                                                                                                                        | Rezeptiv und produktiv                                                                                                                        |
| <b>Durchführung</b>                                 | Keine Angaben, Einzelverfahren                                                                                                                      | Keine Angaben, Bearbeitung einzeln oder in Gruppen                                                                    | Keine Angaben, Einsatz in Schulklasse, Kleingruppen od. einzeln                                                                 | 2 Schulstunden, Gruppenspiel für 6-8 Kinder                                                                                                                                                                   | Keine Angaben, Einzelverfahren                                                                                                                |
| <b>Objektivität</b>                                 | Keine Angaben (s. SELDAK)                                                                                                                           | Keine Angaben                                                                                                         | Standardisierte Durchführung, Auswertung und Interpretation der Testelemente                                                    | Strukturiertes Gruppenbeobachtungsverfahren, Einsatz von drei Beobachtern                                                                                                                                     | Sehr hohe Beobachterübereinstimmung <sup>12</sup>                                                                                             |
| <b>Reliabilität</b>                                 | $\alpha = .88$ bis $.95$                                                                                                                            | Keine Angaben                                                                                                         | Keine Angaben                                                                                                                   | Keine Angaben                                                                                                                                                                                                 | $\alpha = .82$ bis $.94$ <sup>12</sup>                                                                                                        |

|                                   |                                                                             |               |                                                                                |               |                                                                                                            |
|-----------------------------------|-----------------------------------------------------------------------------|---------------|--------------------------------------------------------------------------------|---------------|------------------------------------------------------------------------------------------------------------|
| <b>Validität</b>                  | Keine Angaben (s. SELDAK)                                                   | Keine Angaben | Keine Angaben                                                                  | Keine Angaben | Untersuchung zur Kriteriumsvalidität (z. B. andere Verfahren, Kinder mit und ohne Förderung) <sup>12</sup> |
| <b>Normierung</b>                 | Bundesweite Stichprobe aus Migrantenkinder und Erzieher/innen (Stand: 2003) | Keine Angaben | Kriterial: Vorgabe zu erwartender Durchschnittsleistungen bei den Testaufgaben | Keine Angaben | Bundesweite Normierungsstichprobe (Stand: 2006)                                                            |
| <b>Steckbrief im ZUSE-Bericht</b> | Ja                                                                          | Nein          | Nein                                                                           | Nein          | Ja                                                                                                         |
| <b>PSYNDEX-Review</b>             | Ja                                                                          | Nein          | Nein                                                                           | Nein          | Nein                                                                                                       |

<sup>7</sup> Ulich, M. & Mayr, T. (2006). *Seldak. Sprachentwicklung und Literacy bei deutschsprachig aufwachsenden Kindern* (Beobachtungsbogen und Begleitheft). Freiburg: Herder.

<sup>8</sup> [http://bildungsserver.berlin-brandenburg.de/lernausgangslage\\_laube.html](http://bildungsserver.berlin-brandenburg.de/lernausgangslage_laube.html) [12.06.2014]

<sup>9</sup> LISUM (Landesinstitut für Schule und Medien Berlin - Brandenburg) (2012). *ILeA I. Individuelle Lernstandsanalysen Deutsch Lesen/Rechtschreiben. Erprobungsfassung 2012/2013*. Ludwigsfelde: LISUM.

<sup>10</sup> Hirschfeld, C. & Lassek, M. (2008). *Mit Mirola durch den Zauberwald. Beobachtungsverfahren für den Schulanfang zum Erfassen der Lernvoraussetzungen im Rahmen einer Gruppenbeobachtung*. Oberursel: Finken-Verlag..

<sup>11</sup> Ulich, M. & Mayr, T. (2003). *Sismik. Sprachverhalten und Interesse an Sprache bei Migrantenkinder in Kindertageseinrichtungen* (Beobachtungsbogen und Begleitheft). Freiburg: Herder.

<sup>12</sup> Mayr, T. & Gsottschneider, J. (2013). *Zur Objektivität und Validität des Einschätzungsbogens „Sprache und Literacy bei deutschsprachig aufwachsenden Kindern – SELDAK“*. *Frühe Bildung*, 2(4), 203-211.
